# Supplementary material
Source: HighWire-hosted journal article supplement (https://gh.bmj.com/content/8/12/e013470)
Supplement: inline-supplementary-material-1 [file inline-supplementary-material-1.pdf]

## Supplementary file 1: Round table and interview discussion guide

| OECD criteria                                                    | MOPH                                                                                                                                                                                                                                                                                                                                                                                                                                                                                                              | SPs                                                                                                                                                                                                                                                                                                                                                                                                                                                                                                               | TPM                                                                                                                                                                                                                                                                                                                                                                                                                                                                                                               |
|------------------------------------------------------------------|-------------------------------------------------------------------------------------------------------------------------------------------------------------------------------------------------------------------------------------------------------------------------------------------------------------------------------------------------------------------------------------------------------------------------------------------------------------------------------------------------------------------|-------------------------------------------------------------------------------------------------------------------------------------------------------------------------------------------------------------------------------------------------------------------------------------------------------------------------------------------------------------------------------------------------------------------------------------------------------------------------------------------------------------------|-------------------------------------------------------------------------------------------------------------------------------------------------------------------------------------------------------------------------------------------------------------------------------------------------------------------------------------------------------------------------------------------------------------------------------------------------------------------------------------------------------------------|
| <b>Relevance:</b> Is there a need?                               | <p>In your view, what was the rationale for having a TPM as an independent party assessing the performance of health service providers? Do you agree with the professed need for this?</p> <p>Moving forward (post 2021), based on your knowledge and experience, do you think alternative models could have been better able to provide information regarding performance and progress of health service providers? Why? How so? What would be their advantages and disadvantages compared to the TPM model?</p> | <p>In your view, what was the rationale for having a TPM as an independent party assessing the performance of health service providers? Do you agree with the professed need for this?</p> <p>Moving forward (post 2021), based on your knowledge and experience, do you think alternative models could have been better able to provide information regarding performance and progress of health service providers? Why? How so? What would be their advantages and disadvantages compared to the TPM model?</p> | <p>In your view, what was the rationale for having a TPM as an independent party assessing the performance of health service providers? Do you agree with the professed need for this?</p> <p>Moving forward (post 2021), based on your knowledge and experience, do you think alternative models could have been better able to provide information regarding performance and progress of health service providers? Why? How so? What would be their advantages and disadvantages compared to the TPM model?</p> |
| <b>Efficiency:</b> Were resources used wisely?                   | <p>Were the resources (financial, HR, time) put in place for TPM justified compared to the costs of service delivery?</p> <p>Did TPM activities take up much of your time? If yes, could you give an example? Was this useful or less so? How? What are/were the consequences of this?</p> <p>Were there any unintended consequences in terms of (in)efficiency resulting from the existence of a TPM?</p>                                                                                                        | <p>Did TPM data/reports support or hinder BPHS/EPHS implementation? How so?</p> <p>Did TPM activities take up much of your time? If yes, could you give an example? Was this useful or less so? How? What are/were the consequences of this? Were there any unintended consequences in terms of (in)efficiency resulting from the existence of a TPM?</p> <p>If considered a hindrance, how could the TPM have functioned in a more supportive manner?</p>                                                        | <p>What opportunities do you see for efficiency gain if any, in terms of TPM data collection, data analyses, data validation and report writing?</p>                                                                                                                                                                                                                                                                                                                                                              |
| <b>Effectiveness:</b> Was the intervention delivered as planned? | <p>(How) did TPM data/reports allow the identification of strengths and weaknesses in the health system, with regards to the BPHS and EPHS implementation?</p> <p>Do you think TPM data was trustworthy and reliable? Why (examples)? How did that affect your behaviour?</p>                                                                                                                                                                                                                                     | <p>How did TPM data/reports allow identification of strengths and weaknesses in the health system, with regards to the BPHS and EPHS implementation?</p> <p>Do you think TPM data was trustworthy and reliable? Why (examples)? How did that affect your behaviour?</p>                                                                                                                                                                                                                                           | <p>How did TPM data/reports allow the identification of strengths and weaknesses in the health system, with regards to the BPHS and EPHS implementation?</p> <p>Do you think TPM data was trustworthy and reliable? Why (examples)? How did that affect your behaviour?</p>                                                                                                                                                                                                                                       |

| OECD criteria                                               | MOPH                                                                                                                                                                                                                                                                                                                                                                                                                                                                                                                                                                                            | SPs                                                                                                                                                                                                                                                                                                                                                                                                                                                                                                                                                                                             | TPM                                                                                                                                                                                                                                                                                                                                                                                                                                                                                                                                                                                             |
|-------------------------------------------------------------|-------------------------------------------------------------------------------------------------------------------------------------------------------------------------------------------------------------------------------------------------------------------------------------------------------------------------------------------------------------------------------------------------------------------------------------------------------------------------------------------------------------------------------------------------------------------------------------------------|-------------------------------------------------------------------------------------------------------------------------------------------------------------------------------------------------------------------------------------------------------------------------------------------------------------------------------------------------------------------------------------------------------------------------------------------------------------------------------------------------------------------------------------------------------------------------------------------------|-------------------------------------------------------------------------------------------------------------------------------------------------------------------------------------------------------------------------------------------------------------------------------------------------------------------------------------------------------------------------------------------------------------------------------------------------------------------------------------------------------------------------------------------------------------------------------------------------|
| <b>Impact:</b> did it change the lives of the target group? | <p>Was TPM data used to improve BPHS and EPHS implementation? Data from which products/aspects of TPM (HMIS verification, BSC, DQA, AHS)? How? If not, why? What strategies could have helped improve this?</p> <p>Did the existence and practices of a TPM have any (positive or negative) unintended consequences for service delivery and access to (quality) healthcare?</p> <p>What would have happened without any TPM?</p>                                                                                                                                                               | <p>Was TPM data used to improve BPHS and EPHS implementation? Data from which products/aspects of TPM (HMIS verification, BSC, DQA, AHS)? How? If not, why? What strategies could have helped improve this?</p> <p>Did the existence of a TPM have any (positive or negative) unintended consequences for service delivery and access to (quality) healthcare?</p> <p>What would have happened without any TPM?</p>                                                                                                                                                                             | <p>Was TPM data used to improve BPHS and EPHS implementation? How? If not, why? What strategies could have helped improve this?</p> <p>What would have happened without any TPM?</p>                                                                                                                                                                                                                                                                                                                                                                                                            |
| <b>Sustainability:</b> what remains after leaving?          | <p>What strategies, if any, were put in place to ensure the systems put in place by TPM would be used in the future by MOPH or SPs?</p> <p>(How) has the existence of a TPM contributed to systems-strengthening? Which factors played an important role in this?</p> <p>Did TPM practices contribute to or undermine aid effectiveness: country ownership, alignment and harmonisation, transparency and accountability? Which factors played an important role in this? Would alternative models have equally or better contributed to health system-strengthening and aid effectiveness?</p> | <p>What strategies, if any, were put in place to ensure the systems put in place by TPM would be used in the future by MOPH or SPs?</p> <p>(How) has the existence of a TPM contributed to systems-strengthening? Which factors played an important role in this?</p> <p>Did TPM practices contribute to or undermine aid effectiveness: country ownership, alignment and harmonisation, transparency and accountability? Which factors played an important role in this? Would alternative models have equally or better contributed to health system-strengthening and aid effectiveness?</p> | <p>What strategies, if any, were put in place to ensure the systems put in place by TPM would be used in the future by MOPH or SPs?</p> <p>(How) has the existence of a TPM contributed to systems-strengthening? Which factors played an important role in this?</p> <p>Did TPM practices contribute to or undermine aid effectiveness: country ownership, alignment and harmonisation, transparency and accountability? Which factors played an important role in this? Would alternative models have equally or better contributed to health system-strengthening and aid effectiveness?</p> |
